# Supplementary material
Source: MDPI journal article supplement (https://www.mdpi.com/2073-4441/12/4/928)
Supplement: s1 [file s1]

## Appendix 2

### 1- Labsara 1 drilling data sheet

#### 1.1. Identification:

Drilling Code: 2/615.

Location: Oujda Angad Province – rural commune of Labsara.

Coordinates: Longitude x = 790521 m; latitude y = 451832 m; altitude z = 700 m.

#### 1.2. Technical and lithological characteristics

##### 1.2.1- Air reconnaissance drilling at 8 "1/2

Depth 304 m.

Water coming - 243 m; Q = 1,5 L/s.

Air-lift tests: Piezometry; = 196,70 m; Dynamic level = 197,75 m; Q = 2,7 L/s.

Duration - 6 hours

Conductivity = 1310  $\mu$ S / cm; T = 25.5 ° C.

##### 1.2.2. Lithological section

| Topside | Underside | Nature                                |
|---------|-----------|---------------------------------------|
| 0       | 6         | Limestone                             |
| 6       | 111       | Marly limestone                       |
| 111     | 242       | Dolomitic limestone with marly joints |
| 242     | 290       | Dolomitic limestone                   |
| 290     | 298       | Marl                                  |

#### 1.3. Bore characteristics

| Diameter | From | To  | Type    |
|----------|------|-----|---------|
| 17"1/2   | 0    | 248 | MFT AIR |
| 12"1/4   | 248  | 300 | MFT AIR |

#### 1.4. Equipment

| Tubing   | Diameter | From | To  | Thickness (mm) | Type of fitting | Type of strainer |
|----------|----------|------|-----|----------------|-----------------|------------------|
| full     | 14"      | 0    | 238 | 8.00           | Welding         |                  |
| Strainer | 14"      | 238  | 244 | 8.00           | Welding         | Coined ribs      |
| full     | 14"      | 244  | 248 | 8.00           | Welding         |                  |
|          |          | 248  | 300 | Bare hole      |                 |                  |

#### 1.5. Development

| Nature   | Type            | Volume (L) |
|----------|-----------------|------------|
| Air-lift | Poly-phosphates | 3          |
| + Pump   | HCL acid        | 2          |

Air-lift: water tubes 4 "1/2 at 288 m - air tubes 1" 1/4 - dimension 282 m.

3/4 "piezometer tubes - 220 m.

Duration - 8 hours;

Piezometry = 196.65 m; Dynamic level = 196.75 m; Q = 3 L/s.

Development by SUBTECK 125 CV pump.

Pump setting elevation: 220 m.

#### 1.5.1. Step pumping test:

Date: from 01/08/2019 to 15/08/2019.

Static level: 201.

| Step | Flow rate (L/s) | Duration (h) | Dynamic level (m) |
|------|-----------------|--------------|-------------------|
| 1    | 15              | 2h           | 204,11            |
| 2    | 18              | 2h           | 204,83            |
| 3    | 21              | 2h           | 205,4             |
| 4    | 24              | 2h           | 207,53            |

#### 1.5.2. Long-term pumping test

| <i>Descent</i> |              |                            |                 |                  |                   |              | <i>ascent</i> |                       |
|----------------|--------------|----------------------------|-----------------|------------------|-------------------|--------------|---------------|-----------------------|
| Date           | Duration (h) | Pump setting elevation (m) | Flow rate (L/s) | Static level (m) | Dynamic level (m) | Drawdown (m) | Duration (h)  | Residual drawdown (m) |
| 16/06/2019     | 72           | 215,00                     | 22              | 201,00           | 207,00            | 6,00         | 2             |                       |

### 1.6. Operating conditions

Flow rate: 22 L/s.

Dynamic level: 207 m.

Pump setting elevation: 215 m.

### 1.7. Quality data

Turbidity (NTU): 0,4.

Conductivity ( $\mu\text{S} / \text{cm}$ ): 1320.

PH: 7,75.

## 2. Labsara 2 drilling data sheet

### 2.1. Identification:

Drilling Code: 6/615.

Location: Oujda Angad Province.

Coordinates: Longitude X : 791869 m      Latitude Y : 453731 m      Altitude Z : 667 m.

### 2.2. Lithological section

| Topside | Underside | Nature    |
|---------|-----------|-----------|
| 0       | 7         | Limestone |

|     |     |                                       |
|-----|-----|---------------------------------------|
| 7   | 114 | Marly limestone                       |
| 114 | 247 | Dolomitic limestone with marly joints |
| 247 | 290 | Dolomitic limestone                   |
| 290 | 300 | Grey marl                             |

### 2.3. Bore characteristics

| Diameter | From | To  | Type         |
|----------|------|-----|--------------|
| 22"      | 0    | 8   | Air Drilling |
| 17"1/2   | 8    | 250 | Air Drilling |
| 8"1/2    | 250  | 300 | Air Drilling |

- First water coming at 245 m; Q = 1.0 L/s.
- Second water coming at 250 m; Q = 2.5 L/s.
- Air lift development - duration 6 hours
- Flow rate = 2,5 L/s.
- Piezometry = 199.00 m.
- Drawdown: = 0,10 m.
- Conductivity: 1470  $\mu$ s/cm; Temperature = 25°C.

### 2.4. Equipment

| Tubing   | Diameter | From   | To     | Thickness (mm) | Type of fitting | Type of strainer   |
|----------|----------|--------|--------|----------------|-----------------|--------------------|
| Full     | 18"5/8   | 0      | 8.00   | 8.00           | Welding         |                    |
| Full     | 14"      | 0      | 227.00 | 8.00           | Welding         |                    |
| Strainer | 14"      | 227    | 245.00 | 8.00           | Welding         | Coined ribs 0.5 mm |
| Full     | 14"      | 245    | 250.00 | 8.00           | Welding         |                    |
| Trou nu  |          | 250.00 | 300.00 |                |                 |                    |

### 2.5. Development

| Nature     | Type          | Volume (L) |
|------------|---------------|------------|
| 1 Air-lift | HCL at 22°    | 2.5        |
| + Pump     | Polyphosphate | 3          |

#### 2.5.1. Step pumping test:

Date: from 01/08/2019 to 15/08/2019.

Static level: 187 m.

Pump setting elevation: 235 m.

| Step | Flow rate (L/s) | Duration (h) | Dynamic level (m) |
|------|-----------------|--------------|-------------------|
| 1    | 8               | 1h30         | 208,36            |
| 2    | 9               | 1h30         | 212,13            |
| 3    | 10              | 1h30         | 216,73            |
| 4    | 11              | 1h30         | 217,08            |

### 2.5.2. Long- term pumping test

| <i>Descent</i> |              |                            |                 |                  |                   |              | <i>ascent</i> |                       |
|----------------|--------------|----------------------------|-----------------|------------------|-------------------|--------------|---------------|-----------------------|
| Date           | Duration (h) | Pump setting elevation (m) | Flow rate (L/s) | Static level (m) | Dynamic level (m) | Drawdown (m) | Duration (h)  | Residual drawdown (m) |
| 17/05/2019     | 72           | 235,00                     | 9               | 187,00           | 222,65            | 35,65        | 2             |                       |

### 2.6. Operating conditions

Flow rate: 9 L/s.

Dynamic level: 222,65 m.

Pump setting elevation: 235 m.
