# Supplementary material
Source: MDPI journal article supplement (https://www.mdpi.com/2073-4441/12/4/928)
Supplement: s1 [file s1]

## Appendix 1

### T.O.C. Boreholes data

| Drilling number | X (m)  | Y (m)  | Z (m)   | Objectif of drilling | Depth (m) | Flow rate (L/s) |
|-----------------|--------|--------|---------|----------------------|-----------|-----------------|
| 229/11          | 730565 | 427565 | 361     | Exploitation         | 20        | 8,5             |
| 228/11          | 730425 | 427324 | 364     | Exploitation         | 20        | 5,7             |
| 230/11          | 730710 | 428500 | 367,5   | Exploitation         | 20        | 6,5             |
| 231/11          | 730500 | 427531 | 360     | Exploitation         | 22,5      | 23              |
| 851/11          | 730550 | 427450 | 362     | Exploitation         | 25        | 20              |
| 852/11          | 730650 | 427100 | 363     | Exploitation         | 25        | 21              |
| 447/11          | 732750 | 425450 | 386     | Exploitation         | 25        | 5,5             |
| 474/11          | 731270 | 427380 | 370     | Exploration          | 30        | 0               |
| 448/11          | 733550 | 424650 | 396     | Exploitation         | 35        | 3,65            |
| 477/11          | 731270 | 427320 | 370     | Exploitation         | 40        | 83,3            |
| 278/11          | 765500 | 446250 | 605,5   | Exploitation         | 50        | 0               |
| 864/11          | 760120 | 424230 | 1000    | Exploration          | 62,4      | 0               |
| 14/11           | 765050 | 446900 | 591,932 | Exploration          | 62,5      | 0               |
| 844/11          | 765500 | 440400 | 572     | Exploration          | 64        | 0               |
| 846/11          | 767050 | 448550 | 580     | Exploration          | 64        | 0               |
| 1076/11         | 727950 | 429500 | 350     | Exploration          | 70        | 0               |
| 1212/11         | 721580 | 430934 | 343     | Exploitation         | 71        | 18              |
| 1224/11         | 749837 | 447253 | 429     | Exploitation         | 80        | 5               |
| 1213/11         | 749800 | 447250 | 420     | Piezometry           | 80        | 2,5             |
| 1186/11         | 731072 | 434437 | 388     | Exploration          | 82        | 15              |
| 1138/11         | 724450 | 425900 | 361     | Exploitation         | 84        | 2,5             |
| 843/11          | 765800 | 446400 | 610     | Exploration          | 85        | 0               |
| 1110/11         | 727940 | 429500 | 360     | Exploitation         | 90        | 26              |
| 1108/11         | 721550 | 430900 | 350     | Exploration          | 100       | 16              |
| 3301/12         | 778818 | 444094 | 653     | Piezometry           | 100       | 3,5             |
| 850/11          | 765500 | 448400 | 572     | Exploitation         | 101       | 40              |
| 564/11          | 718500 | 437400 | 269,8   | Exploitation         | 105       | 5               |
| 541/11          | 768000 | 432700 | 736     | Exploitation         | 110       | 0               |
| 516/11          | 765400 | 427380 | 800     | Exploitation         | 110       | 1,6             |
| 863/11          | 755400 | 427375 | 800     | Exploration          | 110       | 2,6             |
| 507/11          | 750000 | 447510 | 440     | Exploitation         | 120       | 2               |
| 1106/11         | 746150 | 445250 | 380     | Exploitation         | 120       | 0               |
| 3234/12         | 774100 | 436300 | 720     | Exploitation         | 122       | 2,8             |
| 524/11          | 750500 | 444620 | 434     | Exploitation         | 135       | 14,05           |
| 869/11          | 750620 | 444620 | 434     | Exploration          | 138       | 0               |
| 1184/11         | 751900 | 430100 | 700     | Exploitation         | 146       | 3,1             |
| 1069/11         | 723300 | 437800 | 375     | Exploration          | 148       | 0               |
| 239/12          | 779930 | 440890 | 710     | Exploitation         | 150       | 6               |
| 1079/11         | 766600 | 446050 | 590     | Piezometry           | 150       | 0               |
| 3346/12         | 778000 | 446000 | 650     | Piezometry           | 150       | 2,2             |
| 1146/11         | 718500 | 437430 | 300     | Exploitation         | 151       | 35              |
| 1154/11         | 762000 | 445100 | 550     | Exploration          | 152       | 0               |
| 1174/11         | 731050 | 435100 | 360     | Exploitation         | 160       | 45,5            |
| 1231/11         | 750500 | 426500 | 746     | Exploitation         | 160       | 2,5             |
| 3040/12         | 790108 | 440400 | 810     | Exploitation         | 160       | 0,5             |

|         |        |        |         |              |     |      |
|---------|--------|--------|---------|--------------|-----|------|
| 1230/11 | 750500 | 426500 | 746     | Exploration  | 160 | 4,5  |
| 1261/11 | 762698 | 449722 | 400     | Piezometry   | 160 | 8    |
| 1232/11 | 762000 | 445150 | 550     | Piezometry   | 160 | 1,5  |
| 1233/11 | 768500 | 437900 | 690     | Piezometry   | 160 | 1    |
| 3332/12 | 775500 | 444780 | 640     | Piezometry   | 161 | 2,5  |
| 3331/12 | 791000 | 442250 | 800     | Exploitation | 164 | 0,6  |
| 1141/11 | 765250 | 448400 | 572     | Exploitation | 167 | 1    |
| 1168/11 | 767300 | 444450 | 630     | Exploitation | 170 | 45   |
| 1159/11 | 752950 | 445500 | 440     | Exploration  | 174 | 1,2  |
| 211/11  | 767600 | 445520 | 610,021 | Exploitation | 176 | 10   |
| 1223/11 | 718984 | 452579 | 230     | Exploration  | 178 | 0,2  |
| 3333/12 | 773750 | 440500 | 650     | Piezometry   | 178 | 2    |
| 3220/12 | 780000 | 448600 | 650     | Exploitation | 180 | 0    |
| 3158/12 | 773100 | 440850 | 650     | Exploration  | 181 | 3,66 |
| 1119/11 | 767650 | 442000 | 640     | Exploitation | 182 | 36   |
| 1089/11 | 744980 | 436000 | 470     | Exploitation | 192 | 4,5  |
| 555/11  | 765400 | 448000 | 585     | Exploitation | 196 | 5    |
| 2928/12 | 785614 | 445320 | 686     | Exploitation | 197 | 5    |
| 1178/11 | 773100 | 440900 | 650     | Exploitation | 198 | 0    |
| 3181/12 | 773100 | 440900 | 650     | Exploitation | 198 | 3,04 |
| 2812/12 | 786900 | 446050 | 683     | Exploitation | 199 | 1    |
| 3216/12 | 775600 | 444700 | 628     | Exploitation | 200 | 0    |
| 3221/12 | 775800 | 444900 | 630     | Exploitation | 200 | 0    |
| 1520/12 | 786900 | 446050 | 683     | Exploitation | 200 | 5    |
| 3217/12 | 784000 | 442450 | 698     | Exploitation | 200 | 0    |
| 3218/12 | 784350 | 442050 | 699     | Exploitation | 200 | 0    |
| 3219/12 | 784505 | 441500 | 710     | Exploitation | 200 | 0    |
| 1176/11 | 751200 | 427800 | 720     | Exploitation | 200 | 10   |
| 1181/11 | 725200 | 425150 | 370     | Exploration  | 200 | 4,5  |
| 1071/11 | 744970 | 436000 | 470     | Exploration  | 200 | 2    |
| 1226/11 | 749846 | 428167 | 733     | Exploration  | 201 | 0    |
| 1167/11 | 734050 | 434650 | 380     | Exploitation | 205 | 10,6 |
| 2189/12 | 779200 | 446600 | 641,216 | Exploitation | 207 | 6    |
| 572/11  | 712100 | 448150 | 310     | Exploitation | 229 | 0,84 |
| 1038/11 | 757450 | 448450 | 530     | Exploitation | 230 | 1,7  |
| 1026/11 | 750200 | 439800 | 550     | Exploitation | 230 | 0,8  |
| 1129/11 | 751950 | 430100 | 700     | Exploration  | 233 | 4,25 |
| 1029/11 | 749650 | 440310 | 525     | Exploitation | 237 | 6    |
| 873/11  | 760300 | 425580 | 885     | Exploration  | 238 | 0    |
| 509/11  | 758750 | 425000 | 950     | Exploitation | 239 | 5    |
| 1175/11 | 773750 | 447750 | 650     | Exploration  | 240 | 2    |
| 1245/11 | 736366 | 430332 | 471     | Exploration  | 245 | 4    |
| 1010/11 | 746150 | 444450 | 430     | Exploitation | 250 | 0    |
| 212/11  | 766100 | 445600 | 610     | Exploitation | 250 | 3    |
| 2409/12 | 779230 | 446600 | 641,77  | Exploitation | 250 | 5,5  |
| 1153/11 | 729700 | 442050 | 318     | Exploration  | 250 | 1,2  |
| 1145/11 | 752350 | 445600 | 430     | Exploration  | 250 | 10   |
| 1112/11 | 750950 | 425300 | 795     | Exploitation | 253 | 10   |
| 3330/12 | 790800 | 441100 | 800     | Exploration  | 254 | 0,2  |
| 1219/11 | 762291 | 430148 | 856     | Exploration  | 254 | 0,8  |

|         |        |        |         |              |        |      |
|---------|--------|--------|---------|--------------|--------|------|
| 1241/11 | 753450 | 445900 | 440     | Exploitation | 260    | 25   |
| 3165/12 | 779220 | 446550 | 640     | Exploitation | 260    | 10   |
| 3270/12 | 786436 | 438862 | 764     | Exploitation | 260    | 8    |
| 1172/11 | 752360 | 445600 | 428     | Exploitation | 261    | 53   |
| 1039/11 | 758100 | 433500 | 750     | Exploitation | 267    | 9    |
| 2337/12 | 779200 | 446650 | 641,669 | Exploitation | 280    | 5,1  |
| 1101/11 | 761800 | 445100 | 545     | Exploration  | 281    | 2    |
| 1121/11 | 762000 | 447250 | 550     | Exploration  | 290    | 6    |
| 3262/12 | 777400 | 447550 | 655     | Exploration  | 290    | 2,3  |
| 1165/11 | 754800 | 446000 | 450     | Exploration  | 295    | 6,6  |
| 1249/11 | 768268 | 449927 | 578     | Exploration  | 295    | 2    |
| 3213/12 | 785400 | 444200 | 699     | Exploitation | 300    | 0    |
| 3214/12 | 785350 | 443800 | 725     | Exploitation | 300    | 0    |
| 3215/12 | 785550 | 440900 | 727     | Exploitation | 300    | 0    |
| 595/11  | 747400 | 425000 | 750     | Exploitation | 300    | 0    |
| 1004/11 | 755400 | 429500 | 750     | Exploitation | 300    | 0    |
| 1147/11 | 749500 | 446300 | 401     | Exploration  | 300    | 12   |
| 1160/11 | 753400 | 445900 | 440     | Exploration  | 300    | 4,5  |
| 1236/11 | 762300 | 449600 | 555     | Exploration  | 300    | 0,5  |
| 1164/11 | 728650 | 432800 | 370     | Exploration  | 301    | 18   |
| 1250/11 | 737811 | 435975 | 400     | Piezometry   | 320    | 1    |
| 1173/11 | 749550 | 446300 | 401     | Exploitation | 324    | 30   |
| 868/11  | 746000 | 443320 | 422     | Exploration  | 324,56 | 0    |
| 1077/11 | 726100 | 432350 | 479     | Exploitation | 330    | 15   |
| 1163/11 | 732200 | 435500 | 400     | Exploitation | 338    | 0    |
| 1149/11 | 748200 | 447200 | 390     | Exploration  | 342    | 3,5  |
| 1269/11 | 741200 | 436900 | 428     | Exploitation | 350    | 4    |
| 1183/11 | 762750 | 435900 | 750     | Exploration  | 350    | 5    |
| 1152/11 | 751000 | 445700 | 425     | Piezometry   | 350    | 11,2 |
| 1217/11 | 741122 | 435850 | 440     | Exploration  | 404    | 0,5  |
| 1216/11 | 740529 | 433000 | 510     | Exploration  | 420    | 12,2 |
| 2404/12 | 791500 | 449600 | 665,041 | Exploitation | 454,25 | 5    |
| 3232/12 | 793083 | 449066 | 675     | FP           | 900    | 2    |
| 1879/12 | 788550 | 457500 | 605,8   | Piezometry   | 30     | 0    |
| 1887/12 | 790270 | 459100 | 608     | Piezometry   | 30     | 0    |
| 1881/12 | 787150 | 458880 | 610,74  | Piezometry   | 32     | 0    |
| 1880/12 | 787000 | 460800 | 619,27  | Piezometry   | 32     | 0    |
| 1878/12 | 788580 | 460000 | 610,77  | Piezometry   | 33     | 0    |
| 1884/12 | 783680 | 458000 | 618,92  | Piezometry   | 34     | 0    |
| 1882/12 | 785400 | 459150 | 611,93  | Piezometry   | 34,5   | 0    |
| 278/12  | 790000 | 458250 | 605,89  | Exploration  | 41,7   | 0    |
| 1885/12 | 781850 | 458550 | 625,83  | Piezometry   | 47     | 0    |
| 1883/12 | 786150 | 461900 | 628,88  | Piezometry   | 60,5   | 0    |
| 1876/12 | 791600 | 460200 | 609,86  | Piezometry   | 61     | 0    |
| 192/12  | 793400 | 460500 | 609     | Exploitation | 81     | 3,5  |
| 420/12  | 797500 | 460900 | 621     | Exploitation | 95     | 2    |
| 2810/12 | 785450 | 462000 | 630     | Exploitation | 100    | 1,66 |
| 3033/12 | 790600 | 460550 | 610     | Exploitation | 103    | 7    |
| 193/12  | 787600 | 456320 | 609,7   | Exploitation | 106    | 0,27 |
| 2790/12 | 792800 | 458750 | 615     | Exploitation | 120    | 0,26 |

|         |        |        |         |              |        |      |
|---------|--------|--------|---------|--------------|--------|------|
| 2796/12 | 797600 | 460850 | 622     | Exploitation | 120    | 3,6  |
| 3305/12 | 786956 | 460823 | 632     | Piezometry   | 125    | 0    |
| 3306/12 | 781105 | 461956 | 662     | Piezometry   | 125    | 2,5  |
| 2868/12 | 799700 | 465100 | 598,589 | Exploration  | 136    | 0    |
| 2918/12 | 798500 | 456150 | 665     | Exploration  | 136    | 0    |
| 2917/12 | 799360 | 458240 | 650     | Exploration  | 138    | 0    |
| 1228/12 | 777000 | 464150 | 710     | Exploration  | 142    | 0    |
| 2925/12 | 799250 | 458500 | 650     | Exploitation | 150    | 2    |
| 2888/12 | 799704 | 465102 | 597     | Exploitation | 160    | 1,2  |
| 215/12  | 781300 | 457500 | 620     | Exploitation | 160    | 0    |
| 2921/12 | 802200 | 456600 | 456,6   | Exploration  | 163    | 0    |
| 1447/12 | 782050 | 463130 | 672     | Exploitation | 175    | 18,7 |
| 3345/12 | 777000 | 464000 | 700     | Piezometry   | 180    | 0,3  |
| 2864/12 | 797800 | 463750 | 618,695 | Exploration  | 184    | 0    |
| 2819/12 | 773000 | 461900 | 670     | Exploitation | 187    | 3,7  |
| 3261/12 | 773000 | 462200 | 680     | Exploitation | 200    | 0    |
| 3168/12 | 800250 | 455850 | 700     | Exploitation | 200    | 5    |
| 3066/12 | 796350 | 464250 | 640     | Exploitation | 210    | 1,1  |
| 2760/12 | 782050 | 463130 | 672     | Exploitation | 214,53 | 5    |
| 3201/12 | 798650 | 455150 | 680     | Exploration  | 228    | 7    |
| 3226/12 | 796345 | 464245 | 640     | Exploitation | 250    | 3,7  |
| 419/12  | 787330 | 458660 | 610     | Exploration  | 250    | 0    |
| 1673/12 | 776610 | 459200 | 644     | Exploitation | 259    | 1,3  |
| 1656/12 | 801350 | 455640 | 700     | Exploitation | 259    | 2,8  |
| 274/11  | 772800 | 457100 | 635     | Exploitation | 268,03 | 2    |
| 705/11  | 772850 | 457000 | 630     | Exploitation | 290    | 4    |
| 2020/12 | 790660 | 455550 | 619     | Exploitation | 311    | 4,05 |
| 2157/12 | 775400 | 453950 | 650     | Exploitation | 311    | 2,4  |
| 564/11  | 718500 | 437400 | 269,8   | Exploitation | 105    | 5    |
| 1026/11 | 750200 | 439800 | 550     | Exploitation | 230    | 0,8  |
